output. In fact, the advantage of being able to maintain a normal  $\text{Pa}_{\text{CO}_2}$  in the face of large tidal volumes, as well as the benefits of improved humidity<sup>2</sup> and heat retention, have caused us to favor this method. No doubt controlled studies concerned with the effect of this technique on cardiac output are needed.

In our study, both collision broadening and nitrous oxide effects were compensated for in calibrating the capnograph. Severinghaus<sup>5</sup> has shown that nitrogen also has collision broadening effects similar to, but not quite as large as, those of nitrous oxide. Our capnograph was calibrated using 5 per cent  $\text{CO}_2$  in nitrogen, which should make the error from collision broadening less than the inherent errors of the capnograph reading or the blood-gas analysis. The capnograph was zeroed against the gases in the fresh-gas inflow line to eliminate the effects of nitrous oxide. We apologize for omitting this from our Methods section.

ROBERT L. RAYBURN, M.D.\*  
Major, MC

\* Current address: Department of Anesthesiology, Primary Children's Medical Center, 320 12th Avenue, Salt Lake City, Utah 84103.

Anesthesiology  
50:173, 1979

### PEEP for the Morbidly Obese

*To the Editor:*—The recent article of Salem *et al.*<sup>1</sup> was of interest to me because I have been providing anesthesia to many morbidly obese patients for gastric bypass operations. It has been my experience that the application of PEEP during the operation greatly improves the arterial blood-gas values of these patients.

In an attempt to explain the discrepancy between the results reported by Salem *et al.* and my own experience, I examined the anesthetic records of 34 morbidly obese patients undergoing either gastric or jejunoileal bypass procedures for the treatment of morbid obesity. These patients were all anesthetized using a balanced technique, *i.e.*, narcotic and relaxant drugs and nitrous oxide-oxygen. The inspired oxygen concentration was maintained at 30–35 per cent. When a  $\text{Pa}_{\text{O}_2}$  value of less than 100 torr was encountered, PEEP was applied, usually 10–15 cm  $\text{H}_2\text{O}$ . The application of 10 cm PEEP resulted in an improvement in arterial oxygenation of 20–25 per cent. PEEP was most frequently needed by patients undergoing gastric bypass procedures that involved prolonged high abdominal retraction. PEEP was used only once in a patient undergoing jejunoileal bypass, which does not necessitate such profound retraction.

The difference in our experiences may be due to

Brooke Army Medical Center  
Fort Sam Houston, Texas 78234

SHIRLEY A. GRAVES, M.D.  
Associate Professor of Anesthesia and Pediatrics  
University of Florida College of Medicine  
Gainesville, Florida 32615

### REFERENCES

1. Rayburn RL, Graves SA: A new concept in controlled ventilation of children with the Bain anesthetic circuit. *ANESTHESIOLOGY* 48:250–253, 1978
2. Ramanathan S, Chalon J, Capan L, et al: Rebreathing characteristics of the Bain anesthesia circuit. *Anesth Analg (Cleve)* 56:822–825, 1977
3. Nunn JF, Hill DW: Respiratory deadspace and arterial to end-tidal  $\text{CO}_2$  tension difference in anesthetized man. *J Appl Physiol* 15:383–389, 1960
4. Nunn JF: Applied Respiratory Physiology with Special Reference to Anesthesia. Appendix D. London, Butterworths, 1969
5. Severinghaus JW, Larson CP, Eger EI: Correction factors for infrared carbon dioxide pressure broadening by nitrogen, nitrous oxide and cyclopropane. *ANESTHESIOLOGY* 22:429–432, 1961

(Accepted for publication August 24, 1978.)

two factors: first, evidently the surgical procedure Salem *et al.* studied was the intestinal bypass variety, not involving such marked retraction on the diaphragm; second, the myocardial depression from enflurane (the anesthetic they used), when combined with PEEP, caused considerable decreases in cardiac output, which would offset any improvement in alveolar ventilation. We have both used large tidal volumes.

In summary, I believe that PEEP is extremely valuable in the anesthetic management of the morbidly obese patient, especially when using a balanced technique in situations in which nitrous oxide concentration and surgical retraction are both high.

LYNDA S. KOEHLER, M.D.  
Assistant Professor  
Department of Anesthesiology  
School of Medicine  
University of North Carolina at  
Chapel Hill  
Chapel Hill, North Carolina 27514

### REFERENCE

1. Salem MR, Dalal FY, Zygmunt MP, et al: Does PEEP improve intraoperative arterial oxygenation in grossly obese patients? *ANESTHESIOLOGY* 48:280–281, 1978

(Accepted for publication August 24, 1978.)
